# Supplementary material for: Laser-induced reduced graphene oxide for high-performance electrochemical sensors of antipyretic drug in real samples
Source: Royal Society of Chemistry journal article supplement (doi:10.1039/d3en00780d), 2024-01-01
Supplement: d3en00780d1.pdf [file d3en00780d1.pdf]

## **Supplementary Information**

### **Laser Induced-Reduced Graphene Oxide for High Performance Electrochemical Sensors of Antipyretic Drug in Real Samples**

**Ravikumar Murugan<sup>a</sup>, Kuo-Yuan Hwa<sup>a, \*</sup>, Shih-Feng Tseng<sup>b</sup>, Aravindan Santhan<sup>a</sup>, and Jhih-Yi Lin<sup>b</sup>**

<sup>a</sup>Department of Molecular Science and Engineering, National Taipei University of Technology, Taipei-10608, Taiwan (ROC)

<sup>b</sup>Department of Mechanical Engineering, National Taipei University of Technology, Taipei-106344, Taiwan (ROC)

**\*Corresponding author**

Kuo-Yuan Hwa, Email: [kyhwa@mail.ntut.edu.tw](mailto:kyhwa@mail.ntut.edu.tw)

Tel- 02-27712171 ext. 2419 (0), 2439, 2442 (Lab)

## **Table of Contents**

| <b>S. No.</b> | <b>Contents</b>                                                                                                                                                | <b>Page No.</b> |
|---------------|----------------------------------------------------------------------------------------------------------------------------------------------------------------|-----------------|
| 1             | S1 Materials                                                                                                                                                   | S3              |
| 2             | S2 Instrumentations                                                                                                                                            | S3              |
| 3             | S3(A-D) Real sample preparation                                                                                                                                | S3-5            |
| 4             | Table S1 show specifications of laser patterning apparatus                                                                                                     | S5              |
| 5             | Table S2 show XRD, and Raman data RGO-1-3                                                                                                                      | S6              |
| 6             | Table S3 show XPS (C 1s) fitting data of RGO-1-3                                                                                                               | S6              |
| 7             | Table S4 show XPS (O 1S) fitting data of RGO-1-3                                                                                                               | S6              |
| 8             | Table S5 show electro active surface area values of RGO-1-3                                                                                                    | S7              |
| 9             | Table S6 show Assessments of the Proposed RGO-3/GCE with Previous AP Sensing                                                                                   | S7              |
| 10            | Table S7 Assessment of AP in spiked samples using RGO-3/GCE                                                                                                    | S8              |
| 11            | Figure S1 show XRD, Raman, and IR spectra of GO-1-3                                                                                                            | S8              |
| 12            | Figure S2 show FESEM/EDX/Mapping of GO-1-3                                                                                                                     | S9              |
| 13            | Figure S3 show CV response of the GO-1-3/GCE in supporting electrolyte, and PB solution.                                                                       | S9              |
| 14            | Figure S4-9 show CV curves of the bare GCE, GO-1-3, and RGO-1-2 with different scan rates in supporting electrolyte                                            | S10-15          |
| 15            | Figure S10 show CV curves of the bare GCE, GO-1-3, and RGO-1-2 with different scan rates in PB solution                                                        | S16             |
| 16            | Figure S11 show DPV response of AP with interfering compound                                                                                                   | S17             |
| 17            | Figure S12 show CV response of RGO-3 modified GCE; repeatability (A), reproducibility (B), stability (C), and Long- term storage stability (D), and References | S17-18          |

## **S1 Materials**

$[\text{Fe}(\text{CN})_6]^{2/3-}$  and KCl received from Sigma Aldrich, other reagents were of analytical grade. All chemical were received Sigma Aldrich and used without further purification. Different buffer solutions were made with sodium dihydrogen phosphate ( $\text{NaH}_2\text{PO}_4$ ) and disodium hydrogen phosphate ( $\text{Na}_2\text{HPO}_4$ ). Sodium hydroxide pellets and nitric acid were used to optimize the pH. All aqueous PBS solution were prepared with ultrapure water from a Milli-Q Plus system. All of the above-mentioned chemical compounds were purchased with analytical grades from Sigma Aldrich in Taiwan.

## **S2 Instrumentations**

The functional group investigation of the all-synthesis GO and RGO was measured with Perkin-Elmer Fourier transforms infrared spectroscopy (CHI 1000 C, FT-IR-6600). The structural and the crystalline phase purity of samples were determination with XPERT PRO X-ray diffractometer (XRD) with the Cu  $K\alpha$  radiation. XPS- X-ray photoelectron spectroscopy (XPS) was analyzed by using a thermos-scientific ESCALAB 250. UV-Visible (JASCO V-730) was used to study bandgap of all samples. The morphological, elemental mapping, and the presence of elements were studied with the transmission electron microscopy (TEM, Tecnai G2), and energy-dispersive X-ray spectroscopy (EDAX). CV & DPV analysis as the electrochemical studies were conducted in a standard three-electrode systems (glassy carbon electrode (GCE) as working electrode, Ag/AgCl (saturated KCl) as reference electrode, and platinum wire as counter electrodes) with CHI621D electrochemical workstation (CH Instruments Company, made in the U.S.A).

## **S3: Real sample preparation**

The real samples like human urine, river water, and pharmaceutical tablet sample were used for real sample analysis. Handling of real-samples is carried out according to institutional

review board (IRB) rules and regulations – IRB202010EM108 issued to Dr. Hwa. All the samples were pretreated separately for DPV electrochemical measurements.

### **S3 (A): Preparation of AP standard solution**

AP was prepared using 10 mL (0.001 M) of DI water in a 10 mL volumetric flask, and shaken vigorously using a vortex for until homogenized solution. The as-prepared analyte was stored in light shield amber vial in the refrigerator at 4 °C when not in use. The AP analyte was freshly prepared before the experiment.

### **S3 (B): River Sample Preparation**

The river water samples were collected from the Tamsui river (Taipei, Taiwan), and then samples was filtered with whatmann filter paper, and centrifuged for 15 min at 1600 rpm to get rid off dust particles. The treated river water sample 5 mL was diluted with 0.1 M PB solution (5 mL) at pH 7.0. Later, the diluted stock solution were stored in air tight plastic vials kept in refrigerator and used within a day from collection. The standard concentrations of AP (25, 50, 75, 100, and 125  $\mu$ M) were spiked into the as prepared stock solution samples, transferred into 10 mL volumetric flasks, and stored at 4 °C. DPV technique was used to investigate the real samples analysis with RGO-3/GCE modified electrode in inert atmosphere.

### **S3 (C): Tablet Sample Preparation**

Pharmaceutical tablet purchased from local pharmacy in taiwan, crushed to small pieces, grained as fine powder with mortar, and diluted with ethanol solvent. To remove binder, and fine particles, samples was filtered with whatman filter paper, centrifuged for 20 min at 1400 rpm to get clear AP dose solution. Further, as prepared stock solution was carried out for standard addition from 25, 50, 75, 100, and 125  $\mu$ M in 0.1 M PBS to the working concentration range to electrochemical detection of AP.

### S3 (D): Human Urine Sample Preparation

In brief, about 3 mL of standard biological samples, i.e., human urine is taken, homogenized with 2.0 mL of 0.1 mol L<sup>-1</sup> EDTA merged with 5.0 mL of pH 7.0 McIlvaine buffer solution by using a HY-4 homogenizer model instrument, at a speed of 5000 rpm for 20 mins. As prepared stock solution samples, transferred into 10 mL volumetric flasks, and stored at 4 °C. Further analytical experiments are carried out using this solution in comparison to the standard addition from 25, 50, 75, 100, and 125 µM in 0.1 M PBS to the working concentration range for the electrochemical detection of AP.

**Table S1: Specifications of laser patterning apparatus for laser induced RGO-1-3**

| IPG photonics model YLPN-1-4x200-30-M  |                              |
|----------------------------------------|------------------------------|
| Specifications                         | Values                       |
| Wavelength (nm)                        | 1064                         |
| Maximum average power (W)              | 30                           |
| Pulsed repetition frequency (Hz)       | 1 MHz                        |
| Beam diameter at 1/e <sup>2</sup> (mm) | 1.4 ± 0.02                   |
| Pulse width (ns)                       | 4 to 200                     |
| Peak Power                             | 15 kW                        |
| Spatial mode                           | TEM00 (M <sup>2</sup> < 1.5) |
| Polarization ratio                     | >100:1 Horizontal            |
| Focal length of f-θ lens (mm)          | 105                          |
| Spot size (µm)                         | 50 mm x 50 mm                |
| Scanning speed (mm/s)                  | 15                           |
| Cooling                                | Air Cooling (Open ATM)       |

**Table S2: XRD and Raman data of RGO-1-3**

| Samples | XRD Data               |              |        | Raman                                |
|---------|------------------------|--------------|--------|--------------------------------------|
|         | $2\theta$ values (002) | $d$ -spacing | D (nm) | I <sub>D</sub> /I <sub>G</sub> Ratio |
| RGO-1   | 26.12                  | 0.16         | 7.88   | 0.90                                 |
| RGO-2   | 26.27                  | 0.14         | 9.21   | 0.73                                 |
| RGO-3   | 26.37                  | 0.13         | 5.72   | 1.06                                 |

**Table S3: XPS (C 1s) fitting data of RGO-1-3**

| Samples | C 1s Peak Binding Energy [eV] |                        |       |       |       |
|---------|-------------------------------|------------------------|-------|-------|-------|
|         | C=C (sp <sup>2</sup> )        | C-C (sp <sup>3</sup> ) | C-O   | C=O   | COOH  |
| RGO-1   | 283.6                         | 284.4                  | 285.9 | 287.8 | 289.8 |
| RGO-2   | 283.6                         | 284.7                  | 286   | 287.7 | 289.8 |
| RGO-3   | 283.5                         | 284.3                  | 286.9 | 287.7 | 289.8 |

**Table S4: XPS (O 1s) fitting data of RGO-1-3**

| Samples | O 1s Peak Binding Energy [eV] |       |               |
|---------|-------------------------------|-------|---------------|
|         | C-OH                          | C=O   | C-O-C/C=O/O-H |
| RGO-1   | 534.4                         | 533.6 | 531.6         |
| RGO-2   | 534.8                         | 533.2 | 531.5         |
| RGO-3   | 536.9                         | 534.8 | 532.7         |

**Table S5: The electro active surface area values of RGO-1-3 and Randles Sevcik equation**

| Samples                                                                                                                                                     | EASA (cm <sup>2</sup> ) |
|-------------------------------------------------------------------------------------------------------------------------------------------------------------|-------------------------|
| Bare GCE                                                                                                                                                    | 0.069                   |
| RGO-1                                                                                                                                                       | 0.051                   |
| RGO-2                                                                                                                                                       | 0.038                   |
| RGO-3                                                                                                                                                       | 0.107                   |
| <b>Randles Sevcik Equation</b><br>$I_{pa} = 2.69 \times 10^5 n^{3/2} A D^{1/2} C \nu^{1/2}$                                                                 |                         |
| $I_{pa}$ - Anodic peak current, n - Number of electrons<br>A - Electroactive surface area, D- Diffusion coefficient<br>C - Concentration, $\nu$ - Scan rate |                         |

**Table S6: Assessments of the Proposed RGO-3/GCE with Previous AP Sensing.**

| Modified Electrode   | Sensitivity<br>( $\mu\text{Amm}^{-1}\text{cm}^{-2}$ ) | Linear range<br>( $\mu\text{M}$ ) | LOD<br>( $\mu\text{M}$ ) | References |
|----------------------|-------------------------------------------------------|-----------------------------------|--------------------------|------------|
| SPE/CB-ERGO          | 0.311                                                 | 9.9–95.0                          | 0.18                     | 1          |
| f-MWCNT/GCE          | 0.0686                                                | 1.0–90.0                          | 0.52                     | 2          |
| rGO–PEDOT/GCE        | 16.85                                                 | 1–35                              | 0.40                     | 3          |
| TC8A/AuNPs/MWCNT/GCE | 7.64                                                  | 1–150                             | 0.20                     | 4          |
| AuNP-PGA/SWCNT       | 0.011                                                 | 8.3–145.6                         | 1.18                     | 5          |
| MWCNTs-GNS/GCE       | 0.0143                                                | 0.80–110                          | 0.10                     | 6          |
| RGO-3/GCE            | 2.7271                                                | 0.099-1978.82                     | 5.2 nM                   | This work  |

**Table S7: Assessment of AP in spiked samples using RGO-3/GCE**

| Real Samples | Added ( $\mu\text{M}$ ) | Detected ( $\mu\text{M}$ ) | Recovery (%) |
|--------------|-------------------------|----------------------------|--------------|
| River        | 0                       | -                          | -            |
|              | 25                      | 24.56                      | 98.24        |
|              | 50                      | 49.63                      | 99.26        |
|              | 75                      | 74.68                      | 99.57        |
|              | 100                     | 99.34                      | 99.34        |
|              | 125                     | 124.01                     | 99.20        |
| Tablet       | 0                       | -                          | -            |
|              | 25                      | 24.71                      | 98.84        |
|              | 50                      | 49.83                      | 99.66        |
|              | 75                      | 74.89                      | 99.85        |
|              | 100                     | 99.37                      | 99.37        |
|              | 125                     | 124.41                     | 99.52        |
| Urine        | 0                       | -                          | -            |
|              | 25                      | 24.60                      | 98.40        |
|              | 50                      | 49.64                      | 99.28        |
|              | 75                      | 74.70                      | 99.60        |
|              | 100                     | 99.66                      | 99.66        |
|              | 125                     | 124.27                     | 99.41        |

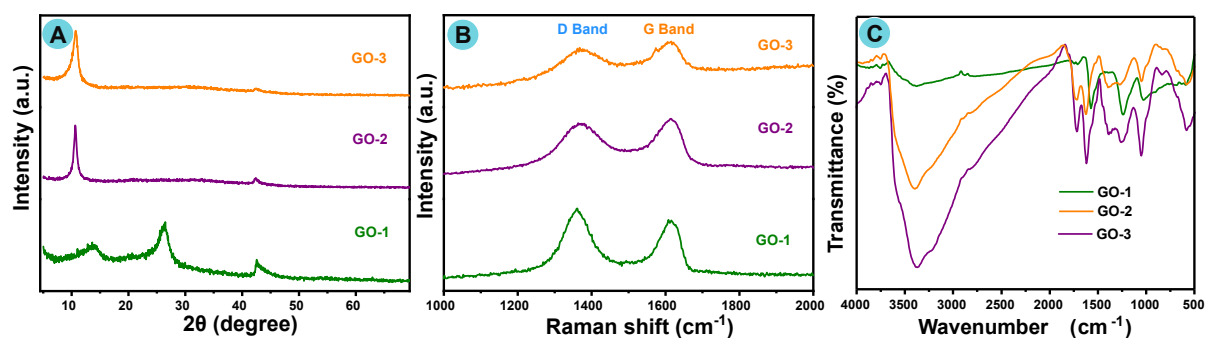

**Figure S1: (A) XRD, (B) Raman, and (C) spectra of GO-1-3.**



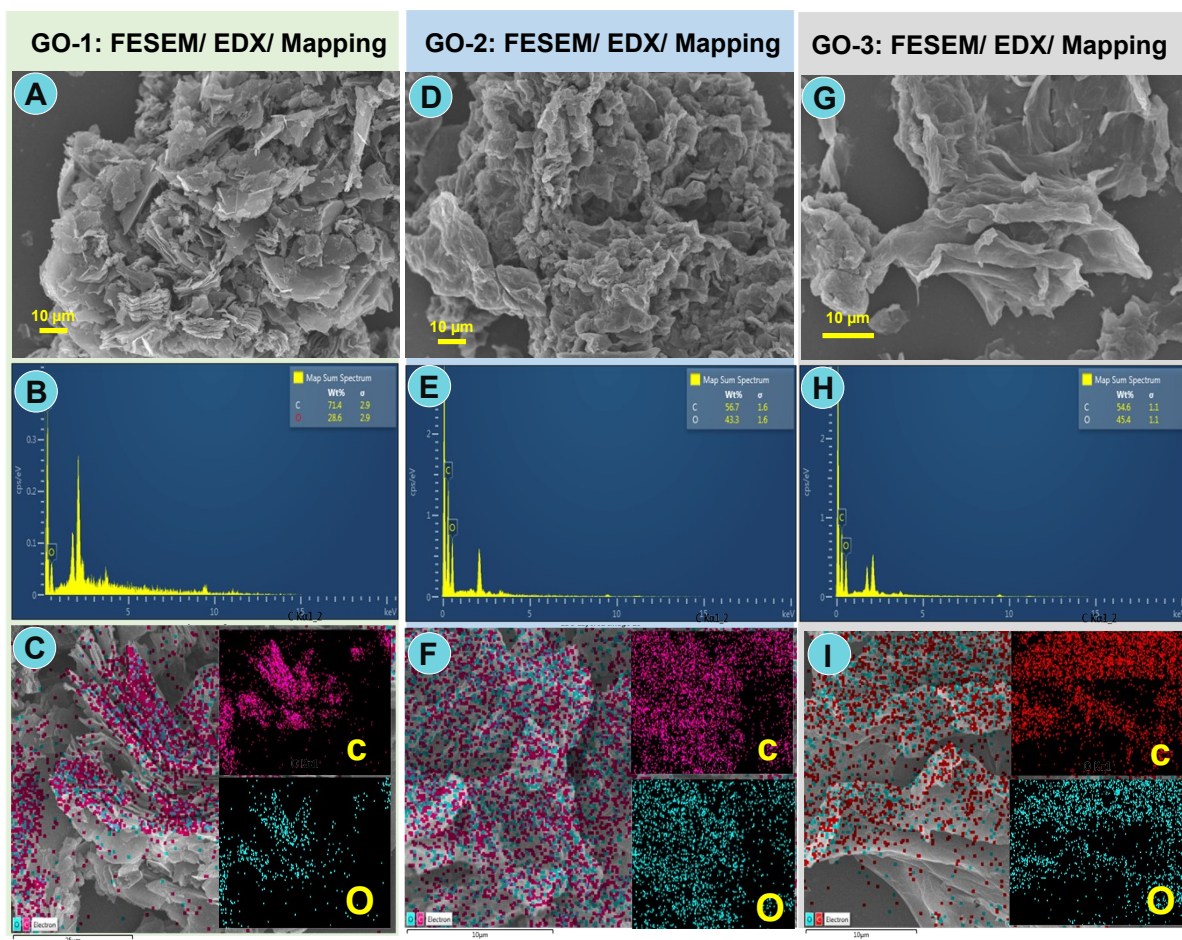

**Figure S2:** FESEM/EDX/Mapping of GO-1 (A-C), FESEM/EDX/Mapping of GO-2 (D-F), and (C) FESEM/EDX/Mapping of GO-3 (G-I).

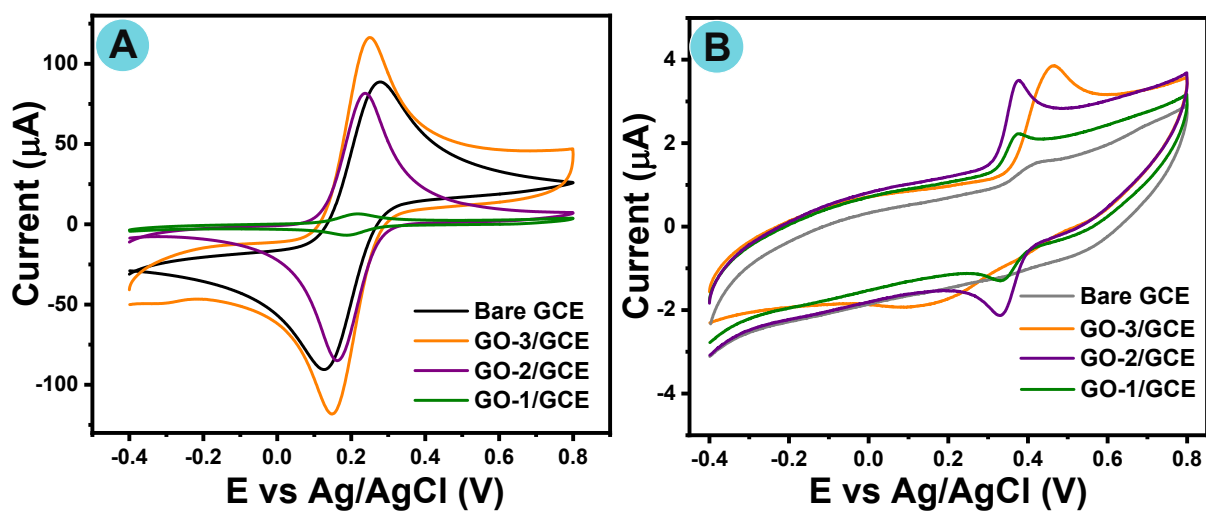

**Figure S3:** (A) and (B) Cyclic voltammograms response of the GO-1-3/GCE in supporting electrolyte, and PB solution with the scan rate at 50 mV/s.

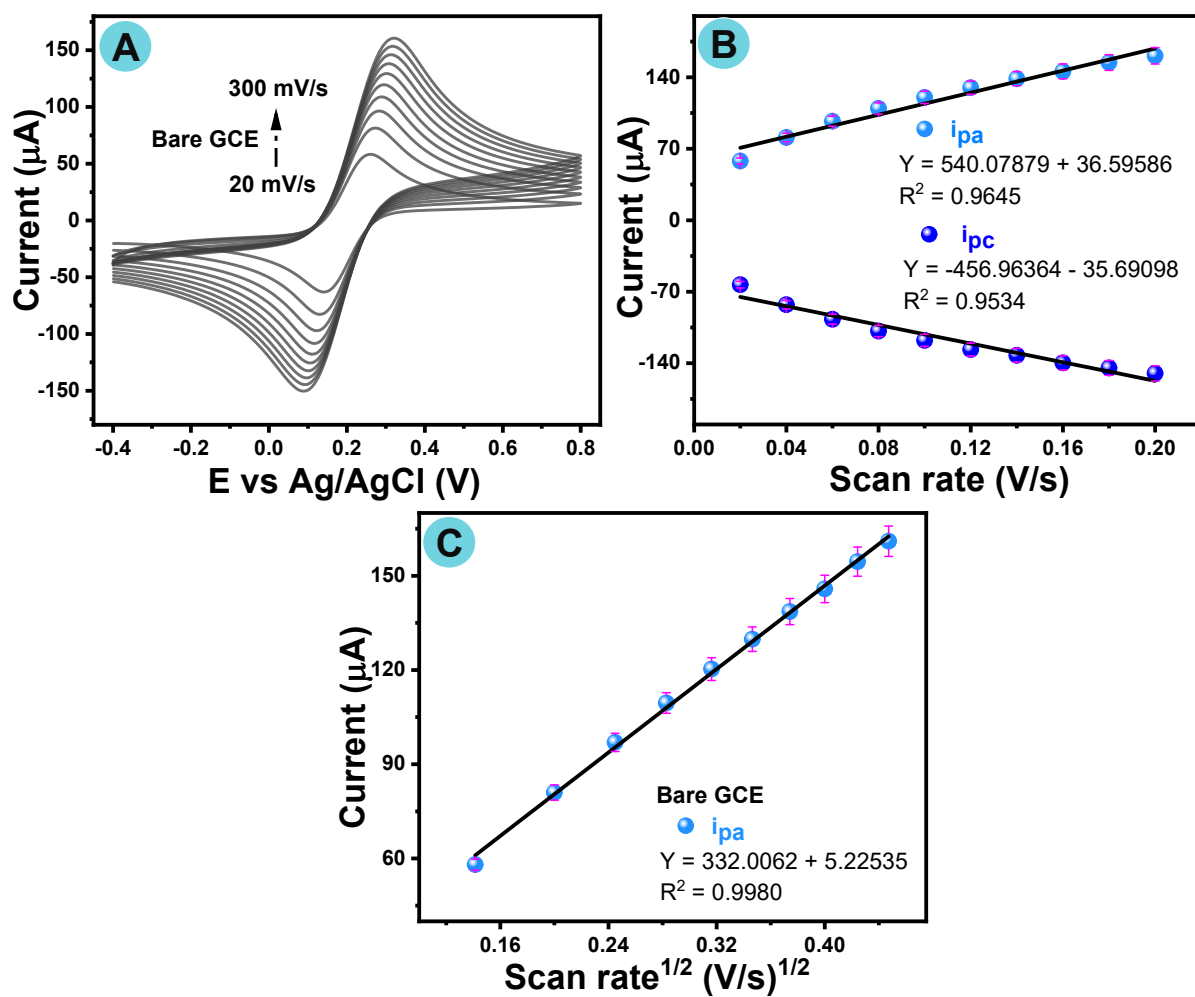

**Figure S4:** (A) Cyclic voltammograms of the bare GCE in 5 mM  $[\text{Fe}(\text{CN})_6]^{3-/4-}$ , 0.1 M of KCl with the scan rate performed from 20 to 200 mV/s for the bare GCE; (B) linear plot for the scan rate (20 to 200 mV/s) vs the anodic and cathodic peak current; and (C) square root of scan rate vs the anodic peak current for the bare GCE.

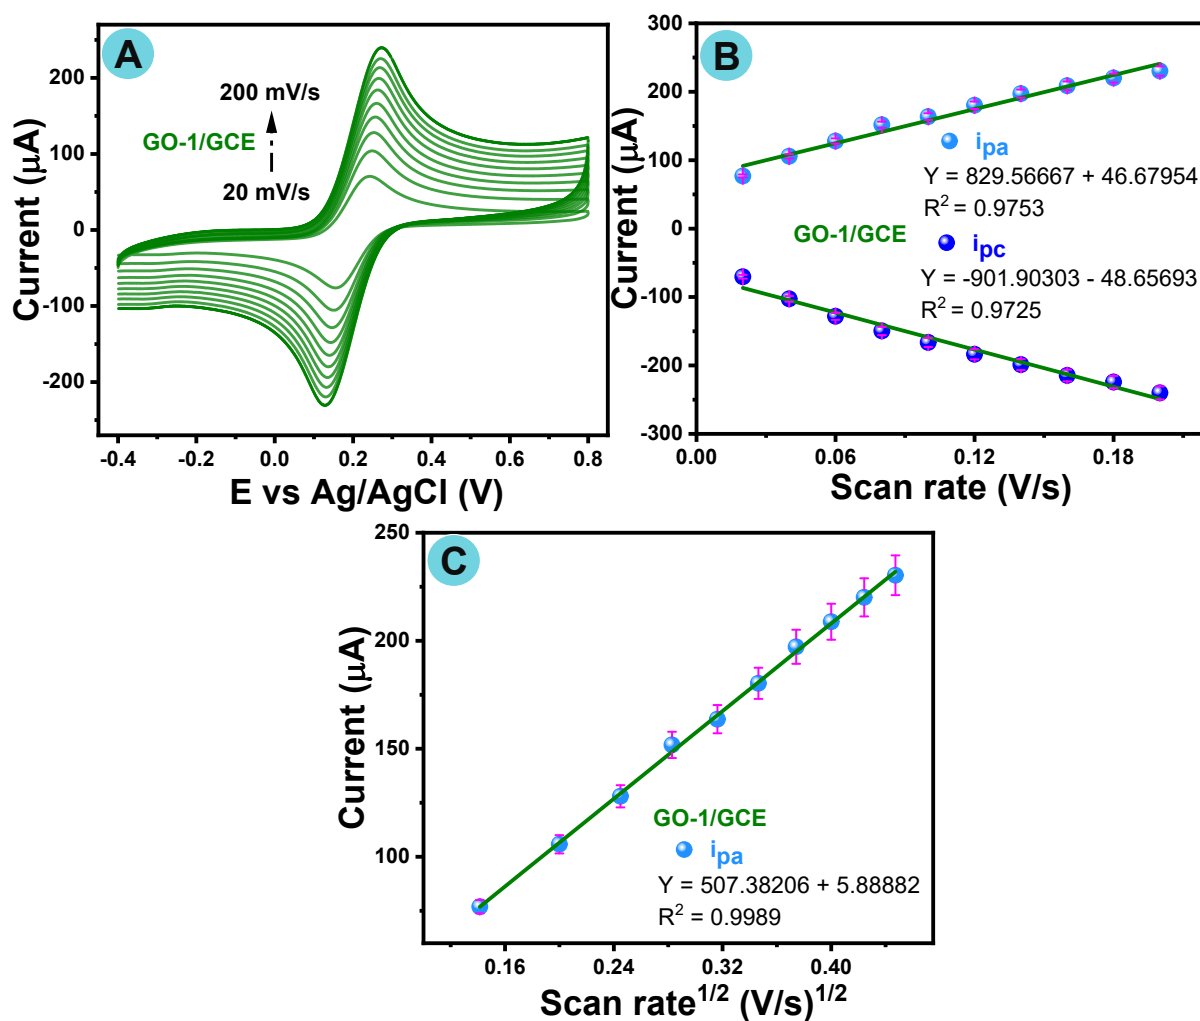

**Figure S5:** (A) Cyclic voltammograms of the GO-1/GCE in 5 mM  $[\text{Fe}(\text{CN})_6]^{3-/4-}$ , 0.1 M of KCl with the scan rate performed from 20 to 200 mV/s for the bare GCE; (B) linear plot for the scan rate (20 to 200 mV/s) vs the anodic and cathodic peak current; and (C) square root of scan rate vs the anodic peak current for the GO-1/GCE.

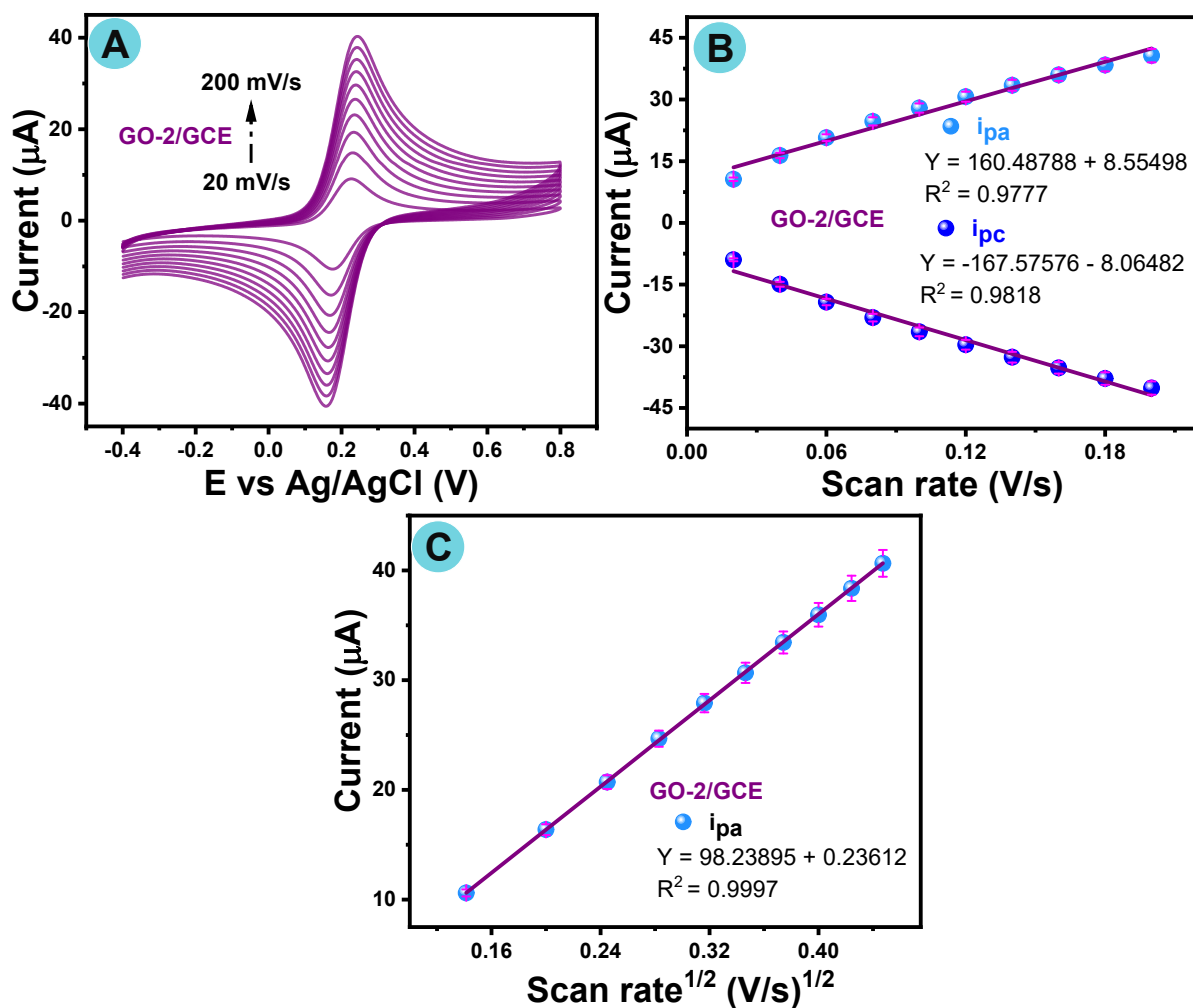

**Figure S6:** (A) Cyclic voltammograms of the GO-2/GCE in 5 mM  $[\text{Fe}(\text{CN})_6]^{3-/4-}$ , 0.1 M of KCl with the scan rate performed from 20 to 200 mV/s for the bare GCE; (B) linear plot for the scan rate (20 to 200 mV/s) vs the anodic and cathodic peak current; and (C) square root of scan rate vs the anodic peak current for the GO-2/GCE.

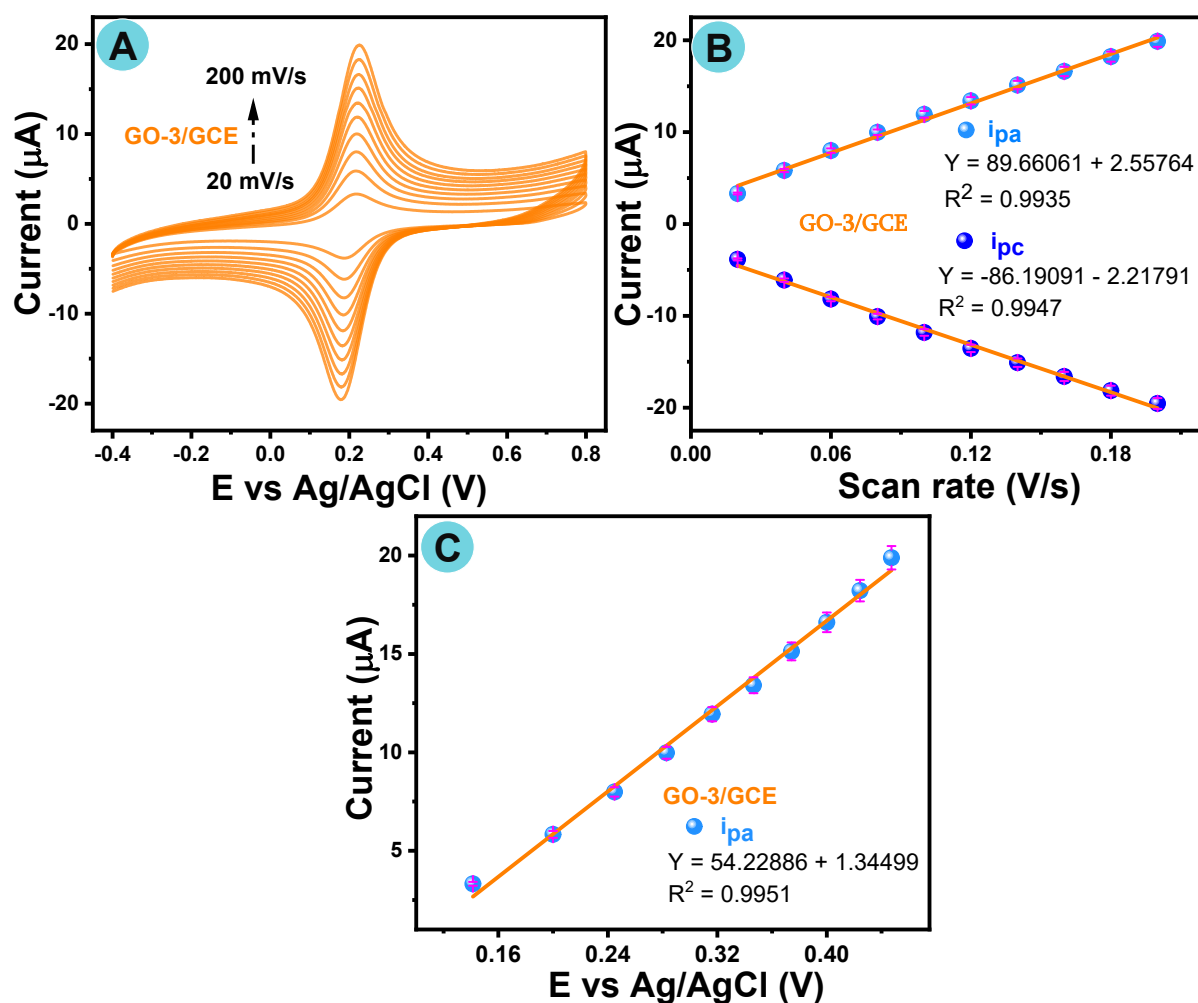

**Figure S7:** (A) Cyclic voltammograms of the GO-3/GCE in 5 mM  $[\text{Fe}(\text{CN})_6]^{3-/4-}$ , 0.1 M of KCl with the scan rate performed from 20 to 200 mV/s for the bare GCE; (B) linear plot for the scan rate (20 to 200 mV/s) vs the anodic and cathodic peak current; and (C) square root of scan rate vs the anodic peak current for the GO-3/GCE.

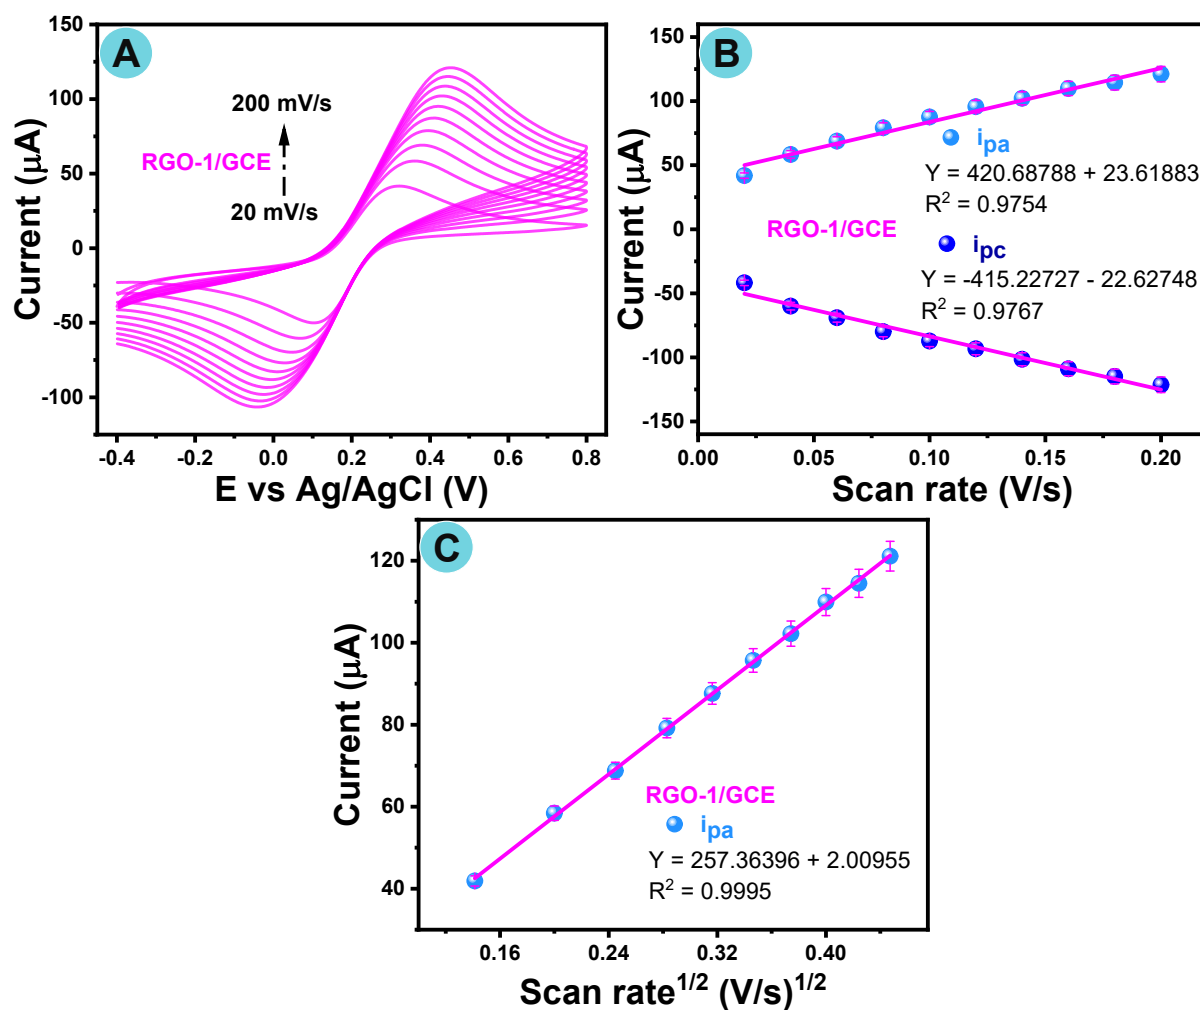

**Figure S8:** (A) Cyclic voltammograms of the RGO-1/GCE in 5 mM  $[\text{Fe}(\text{CN})_6]^{3-/4-}$ , 0.1 M of KCl with the scan rate performed from 20 to 200 mV/s for the bare GCE; (B) linear plot for the scan rate (20 to 200 mV/s) vs the anodic and cathodic peak current; and (C) square root of scan rate vs the anodic peak current for the RGO-1/GCE.

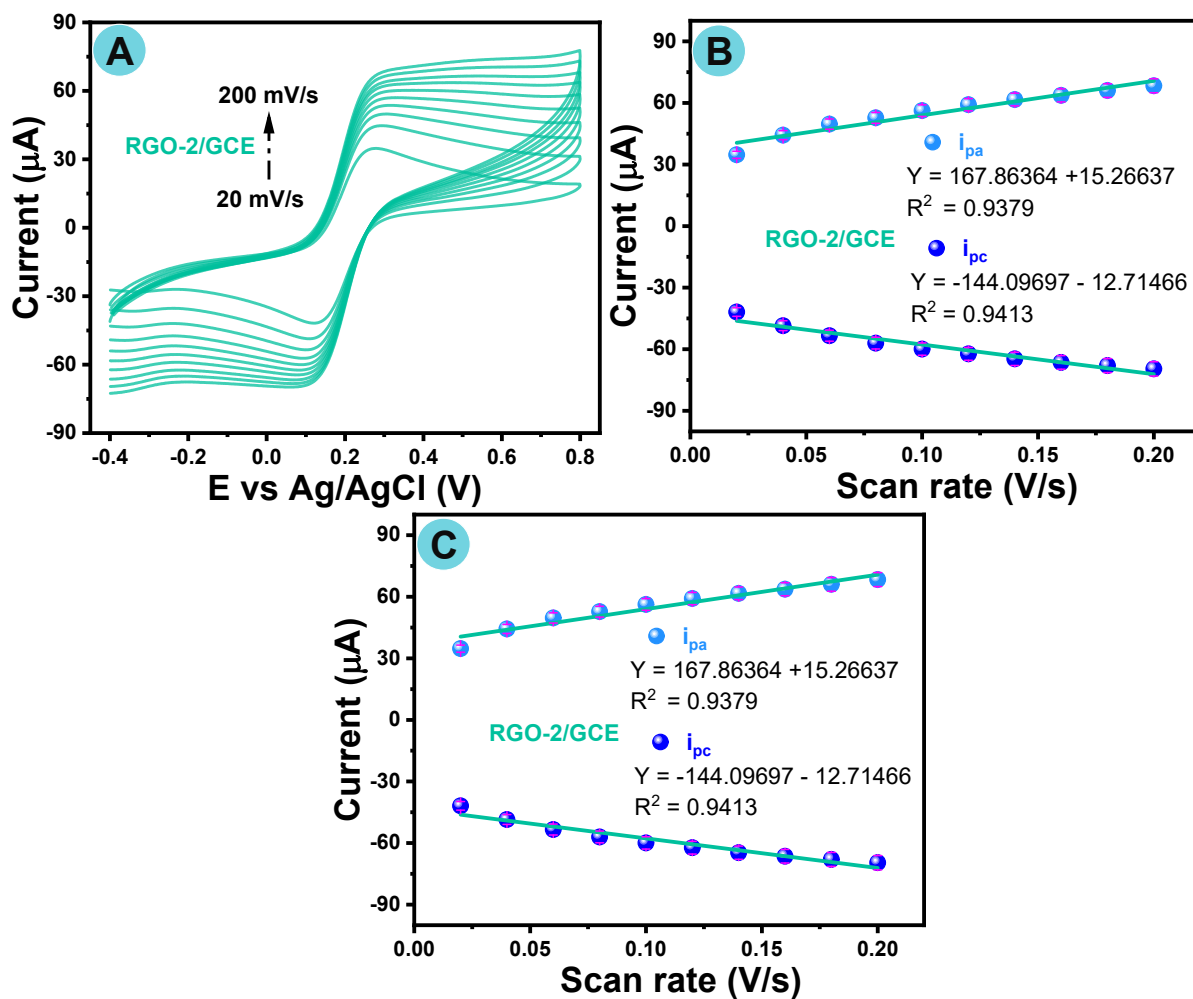

**Figure S9:** (A) Cyclic voltammograms of the RGO-2/GCE in 5 mM  $[\text{Fe}(\text{CN})_6]^{3-/4-}$ , 0.1 M of KCl with the scan rate performed from 20 to 200 mV/s for the bare GCE; (B) linear plot for the scan rate (20 to 200 mV/s) vs the anodic and cathodic peak current; and (C) square root of scan rate vs the anodic peak current for the RGO-2/GCE.

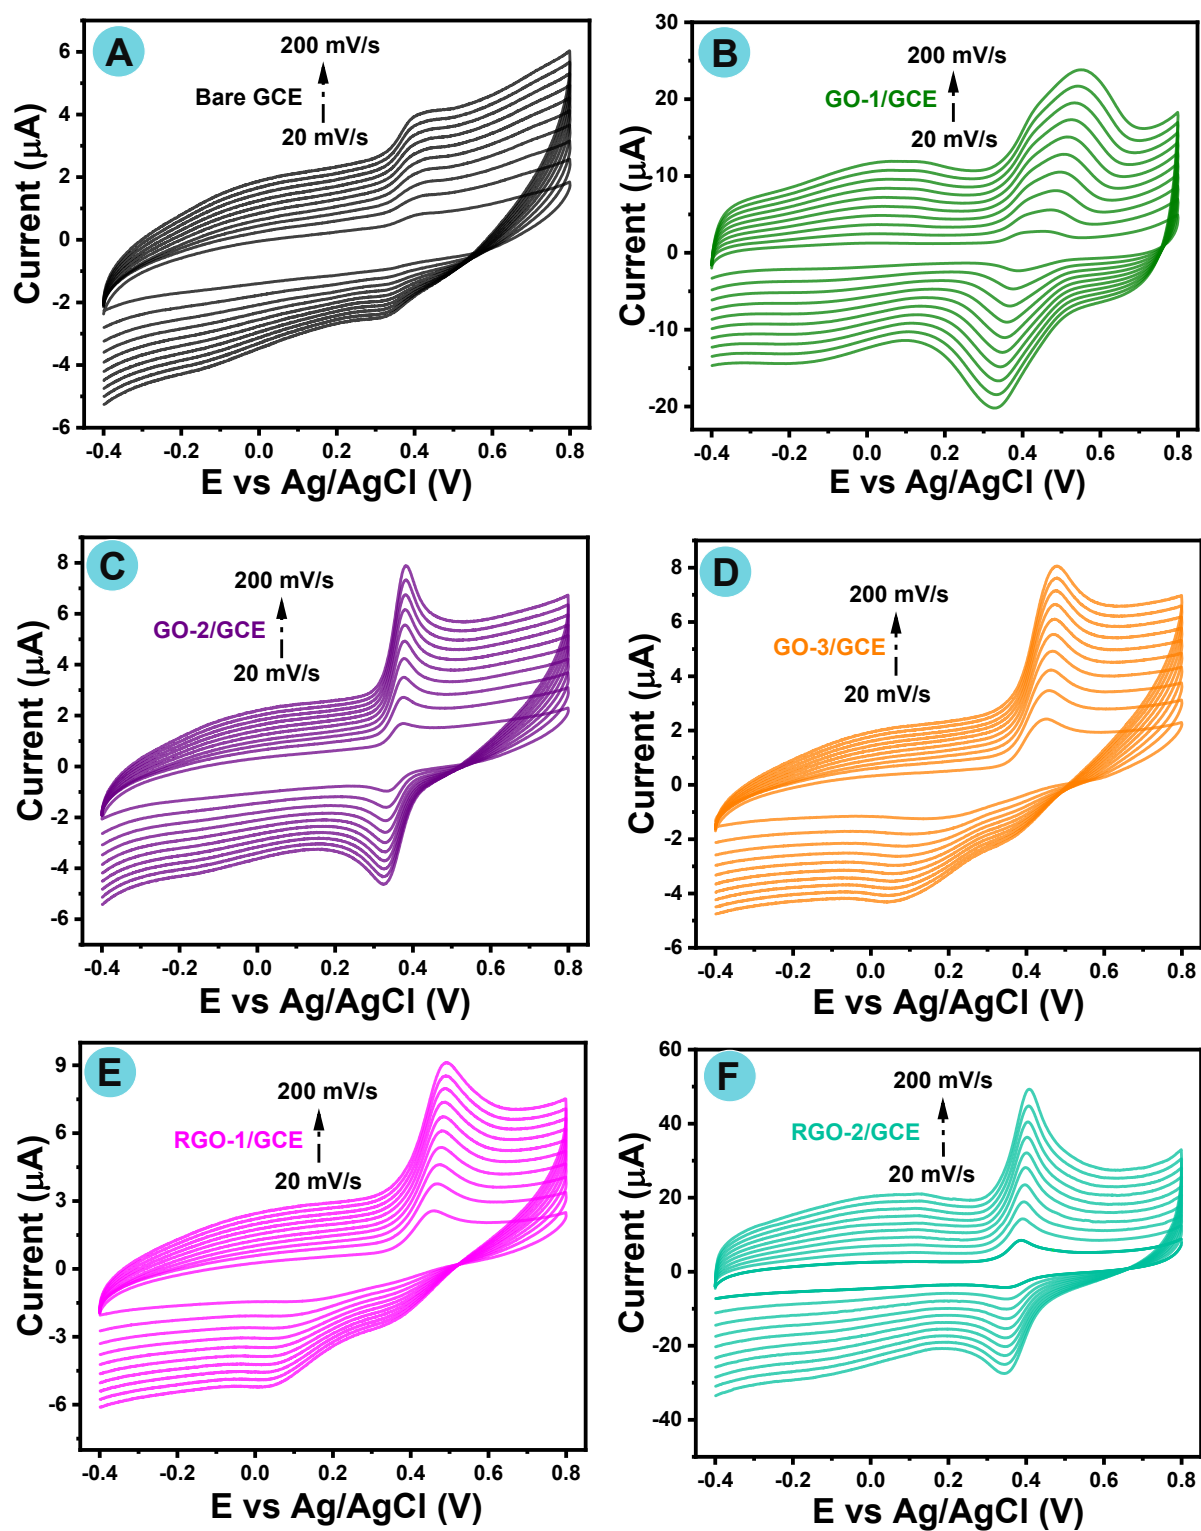

**Figure S10:** Cyclic voltammograms for bare GCE (A), GO-1/GCE (B), GO-2/GCE (C), GO-3/GCE (D), RGO-1/GCE (E), and RGO-2/GCE (F) by varying the scan rate conducted from 20 to 200 mV/s in PBS solution (pH 7.0) with same concentration of AP 100  $\mu$ M (0.001 M) under the inert atmosphere.



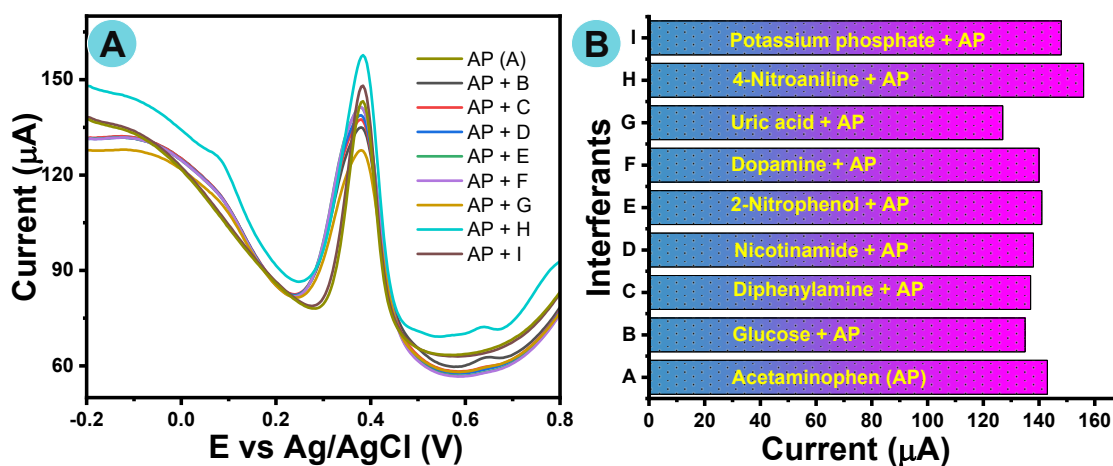

**Figure S11:** (A) DP voltammograms of AP with interfering compounds (1:10 folds) in PBS in  $\text{N}_2$ -purged condition with the RGO-3/GCE, and (B) histogram show interferants vs current.

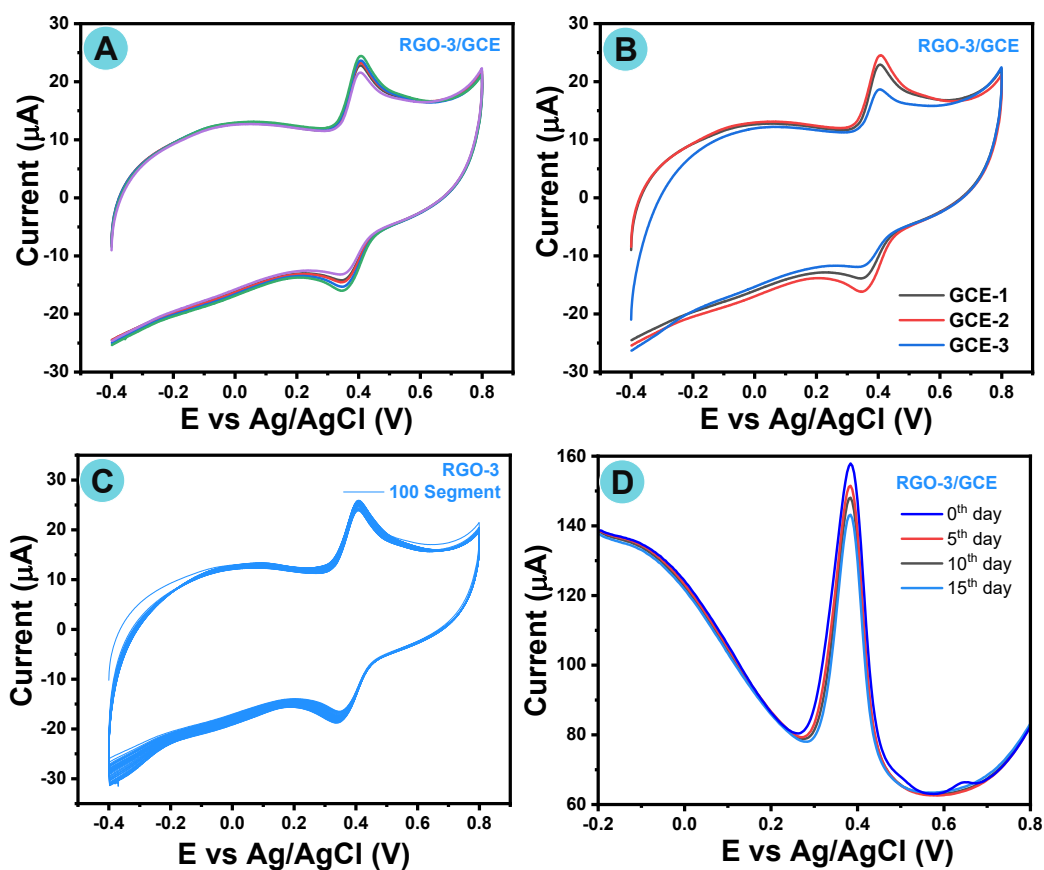

**Figure S12:** Cyclic voltammograms of RGO-3 modified GCE with presence of 100  $\mu\text{M}$  (0.01 M) of AP in PB solution (pH 7.0) scan rate at 0.05 V/s under inert atmosphere: repeatability (A), reproducibility (B), cycle stability (C), and long-term storage stability from DPV study (D).

## Reference:

- (1) Ibáñez-Redín, G. Wilson, D. Gonçalves, D. and Oliveira, O. N., Low-Cost Screen-Printed Electrodes Based on Electrochemically Reduced Graphene Oxide-Carbon Black Nanocomposites for Dopamine, Epinephrine and Paracetamol Detection, *Journal of Colloid and Interface Science*, 2018, **515**, 101–108.
- (2) Baghayeri, M. and Namadchian, M., Fabrication of a Nanostructured Luteolin Biosensor for Simultaneous Determination of Levodopa in the Presence of Acetaminophen and Tyramine: Application to the Analysis of Some Real Samples, *Electrochimica Acta* 2013, **108**, 22–31.
- (3) Huang, T.-Y. Kung, C.-W.; Wei, H.-Y. Boopathi, K. M. Chu, C.-W., and Ho, K.-C. A High-Performance Electrochemical Sensor for Acetaminophen Based on a RGO–PEDOT Nanotube Composite Modified Electrode, *J. Mater. Chem. A* 2014, **2** (20), 7229–7237.
- (4) Chen, Y.; Zheng, G.; Shi, Q.; Zhao, R.; Chen, M., Preparation of Thiolated Calix [8] Arene/AuNPs/MWCNTs Modified Glassy Carbon Electrode and Its Electrocatalytic Oxidation toward Paracetamol, *Sensors and Actuators B: Chemical* 2018, **277**, 289–296.
- (5) Bui, M.-P. N. Li, C. A. Han, K. N.; Pham, X.-H. and Seong, G. H. Determination of Acetaminophen by Electrochemical Co-Deposition of Glutamic Acid and Gold Nanoparticles. *Sensors and Actuators B: Chemical* 2012, **174**, 318–324.
- (6) Arvand, M. and Gholizadeh, T. M, Simultaneous Voltammetric Determination of Tyrosine and Paracetamol Using a Carbon Nanotube-Graphene Nanosheet Nanocomposite Modified Electrode in Human Blood Serum and Pharmaceuticals, *Colloids and Surfaces B: Biointerfaces* 2013, **103**, 84–93.
